# Supplementary material
Source: PubMed Central journal article supplement (PMC3298133)
Supplement: supp_78.6.1836_AEM7514-11_FigS1.pdf [file supp_78.6.1836_AEM7514-11_FigS1.pdf]

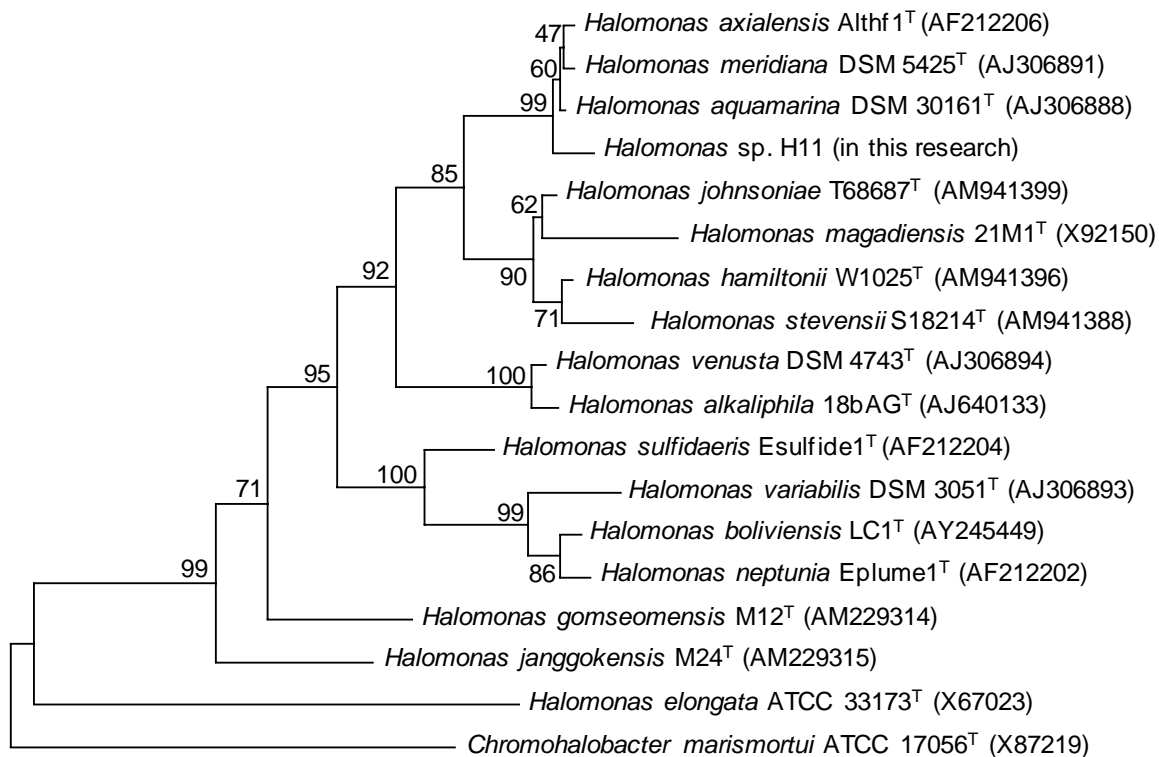

1

0.01

2 SUPPLEMENTAL FIG. 1. Phylogenetic analysis of *Halomonas* sp. H11 strain based on  
 3 16S rRNA sequence.  
 4 Indicator beneath the tree is scale bar representing 0.01 inferred substitutions per nucleotide  
 5 portion. The numbers shown in the branch mean bootstrap values. Type strain is indicated  
 6 as ‘T’ at the end of strain name. Accession number of 16S rRNA sequence is denoted by  
 7 parenthesis.
