# Supplementary material
Source: PubMed Central journal article supplement (PMC3298133)
Supplement: supp_78.6.1836_AEM7514-11_FigS3.pdf [file supp_78.6.1836_AEM7514-11_FigS3.pdf]

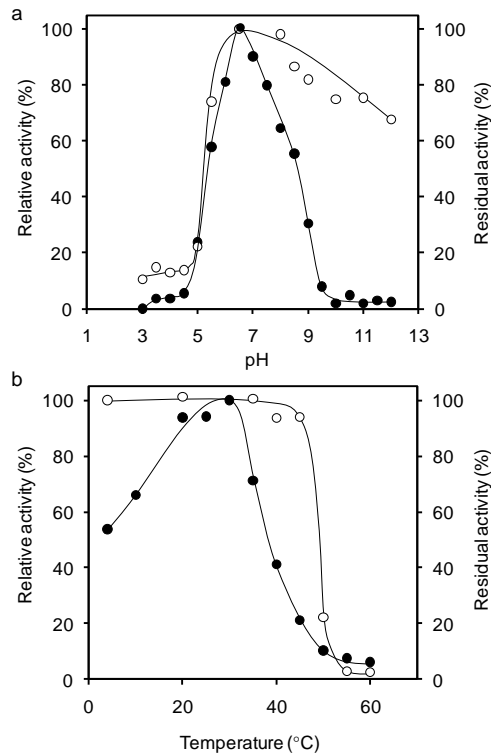

1  
2 SUPPLEMENTAL FIG. 3. Effects of pH and temperature on activity and stability of HaG.  
3 a, Effects of pH. Solid and hollow circles indicate relative activity and residual activity  
4 after 24 h treatment at 4°C respectively. The activity at pH 6.5 was regarded to be 100% in  
5 relative activity. The activity before pH treatment was 100% in residual activity.  
6 b, Effects of temperature. Solid and hollow circles indicate the relative activity and residual  
7 activity after heat treatment for 15 min at pH 7.0, respectively. The activity at 30°C was  
8 regarded to be 100% in relative activity. The activity before heat treatment was 100% in  
9 residual activity.
