# Supplementary material
Source: PubMed Central journal article supplement (PMC3298133)
Supplement: supp_78.6.1836_AEM7514-11_supplemental_tables.pdf [file supp_78.6.1836_AEM7514-11_supplemental_tables.pdf]

| Primer    | Sequence (5'-3')          |
|-----------|---------------------------|
| 9F        | GAGTTTGATCCTGGCTCAG       |
| 785F      | GGATTAGATACCCTGGTAGTC     |
| 802R      | TACCAGGGTATCTAATCC        |
| 1510R     | GGCTACCTTGTTACGA          |
| HAG-N1    | ATGCARGAYAAAYATGATGTGGTGG |
| CS1       | GTTCAATTTTTTCATTCTCACA    |
| HAG-H1    | ACCAAGTGATCAGCCATACCTC    |
| HAG-I     | TACGTCGCGGTAGTCACTCAC     |
| HAG-N2    | ATGATGTGGTGGCGNGGNGG      |
| CS2       | GTAATACGACTCACTATAGGG     |
| HAG-F'1   | AATCCTAAAGCCGACTGGTTCG    |
| HAG-I3    | ATAGCCAGATGCCGTCCAC       |
| HAG-F'3   | TACTATCTGCACAACCTCCTG     |
| HAG-F'4   | TCGACCTGCTCAACATGC        |
| HAG-F'5   | AACGCTTGGCAGGTGACG        |
| HAG-F'6   | TGGCGGTGCTGTTCTCACTG      |
| HAG-R'1   | ATGCCGTTTCAGATCGCCTAC     |
| HAG-R'4   | TCGCTTCCGGTGCACCCAG       |
| pGEM-up-F | TCCATTCGCCATTCAGGCTG      |

|                 |                            |
|-----------------|----------------------------|
| pGEM-dn-R       | TTCCGGCTCGTATGTTGTGTG      |
| pET22b-IC-sense | ATATAGGCGCCAGCAACCGCACCTGT |
| pET22b-IC-anti  | TAACCACCACACCCGCCGCGCTTAAT |

---

1

SUPPLEMENTAL TABLE 2. Summary of HaG purification steps

| Procedures        | Total protein<br>(mg) | Total activity<br>(U) | Specific<br>activity<br>(U/mg) | Yield<br>(%) | Purification<br>(-fold) |
|-------------------|-----------------------|-----------------------|--------------------------------|--------------|-------------------------|
| Cell free extract | 833                   | 19.4                  | 0.0234                         | 100          | 1.00                    |
| DEAE-650M         | 24.8                  | 2.21                  | 0.0893                         | 11.4         | 3.82                    |
| Butyl-650M        | 7.90                  | 19.7                  | 2.49                           | 101          | 106                     |
| Ultrafiltration   | 6.54                  | 7.07                  | 1.08                           | 36.4         | 46.2                    |
| Resource Q        | 0.922                 | 1.09                  | 1.19                           | 5.63         | 50.9                    |

2
