# Supplementary material
Source: PubMed Central journal article supplement (PMC3298133)

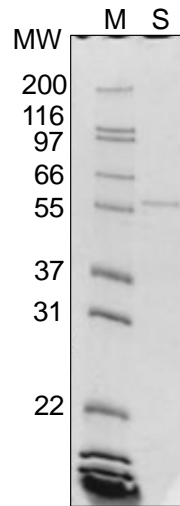

- 1
- 2 SUPPLEMENTAL FIG. 2. SDS-PAGE of purified HaG.
- 3 M, size marker; S, purified HaG.

Supplement: supp_78.6.1836_AEM7514-11_FigS2.pdf [file supp_78.6.1836_AEM7514-11_FigS2.pdf]
